# Supplementary material for: Magnetic ionic plastic crystal: choline[FeCl4]
Source: Royal Society of Chemistry journal article supplement (doi:10.1039/c3cp50749a), 2013-01-01
Supplement: c3cp50749a.pdf [file c3cp50749a.pdf]

## SUPPLEMENTARY MATERIAL:

The presence of water in the sample will have an impact on the physical properties of Choline[FeCl<sub>4</sub>]. It is then a crucial matter to clarify whether or not any water was present. To this end several tests were performed to prove that no water was present in the compound and that its stability is sustained over time.

1. Elemental analysis for Choline[FeCl<sub>4</sub>] indicates a good agreement between calculated and expected molecular formula; C<sub>5</sub>NH<sub>14</sub>OCl<sub>4</sub>Fe
2. The decomposition curves of TGA/DTG of CholineFeCl<sub>4</sub> do not reveal any initial weight loss below 100 °C, associated with water absorbed on the surface from the atmosphere.
3. All further heating and cooling cycles of DSC were reproducible and were similar to the first cooling and second heating, as is mentioned in the manuscript
4. Powder X-ray thermodiffractograms of CholineFeCl<sub>4</sub> were recorded in air heating up from 225 to 400 K and cooling down to 300 K. During the temperature decrease the reversibility of the second process compared with the heating one was preserved. In addition, the presence of ice peaks is not detected.
5. Raman spectroscopy was also used to investigate the absence of water in Choline[FeCl<sub>4</sub>]. In all samples tested, we observed the non-presence of both strong peaks near to 3230, 3390, 3510 cm<sup>-1</sup> and a weak peak at about 1581 1640 cm<sup>-1</sup>, which confirmed the absence of hydration water [1], as can be observed in Fig.S.1 of the supplementary material.
6. We have not seen any changes in the electrochemical response if the heating and cooling cycles are compared. The material presents a high stability in air in the measured temperature range. We have carried out the impedance measurements in a heating and cooling cycle (maintaining the sample 2 h at 450 K) and the obtained similar behaviour during this cycle.

[1] D. M. Carey, G. M. Korenowski, J. Chem. Phys. 1998, 108(7), 2669-26675.

## Figure Captions

**Figure S.1.** Raman spectra of Choline[FeCl<sub>4</sub>] between 100 and 3500 cm<sup>-1</sup>.

**Figure S.2.** D2B neutron data of Choline[FeCl<sub>4</sub>] ( $\lambda = 1.5938 \text{ \AA}$ ) at 300 K.

**Figure S.3.** Low temperature ZFC magnetic susceptibility at difference fields from 0.5 to 50 kOe. The inset shows the evolution of Neel temperature (T<sub>N</sub>) with the applied magnetic field.

**Figure S.4.** Temperature dependence of the real ( $\chi'$ ) and imaginary ( $\chi''$ ) components of the ac magnetic susceptibility for Choline[FeCl<sub>4</sub>] measured under an ac field  $h_{ac} = 3 \text{ Oe}$  and frequencies from 50 to 10000 Hz.

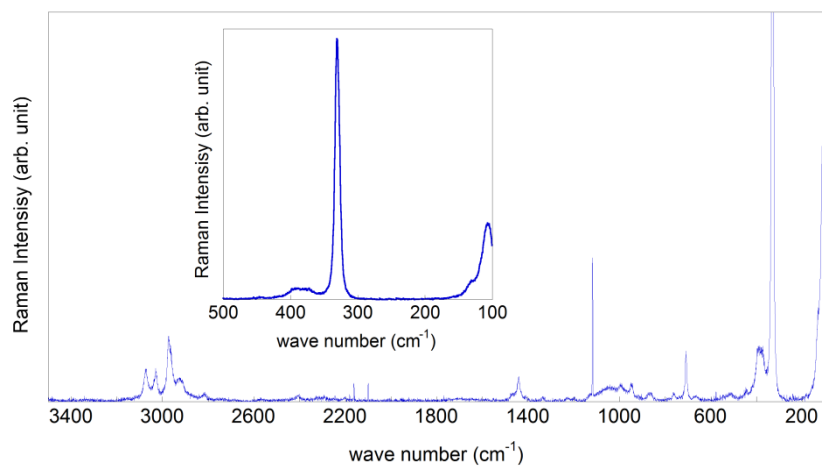

Fig S.1

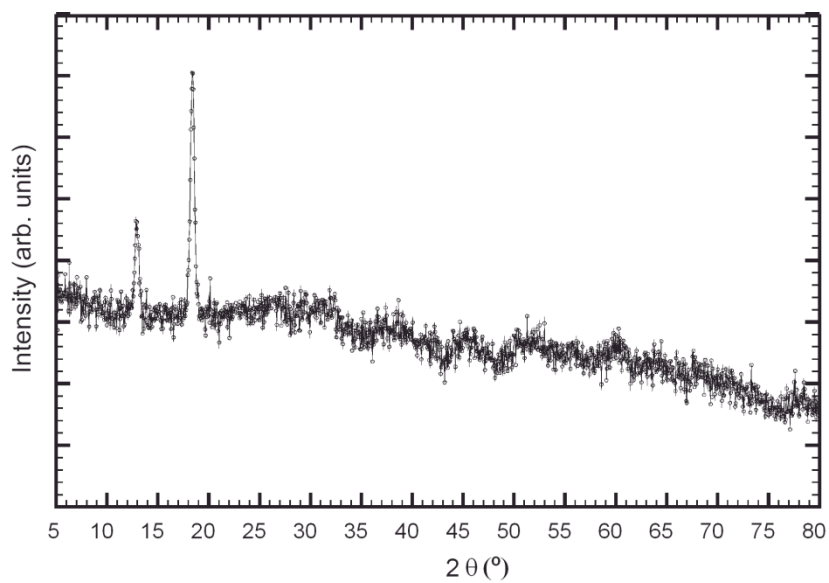

Fig S.2

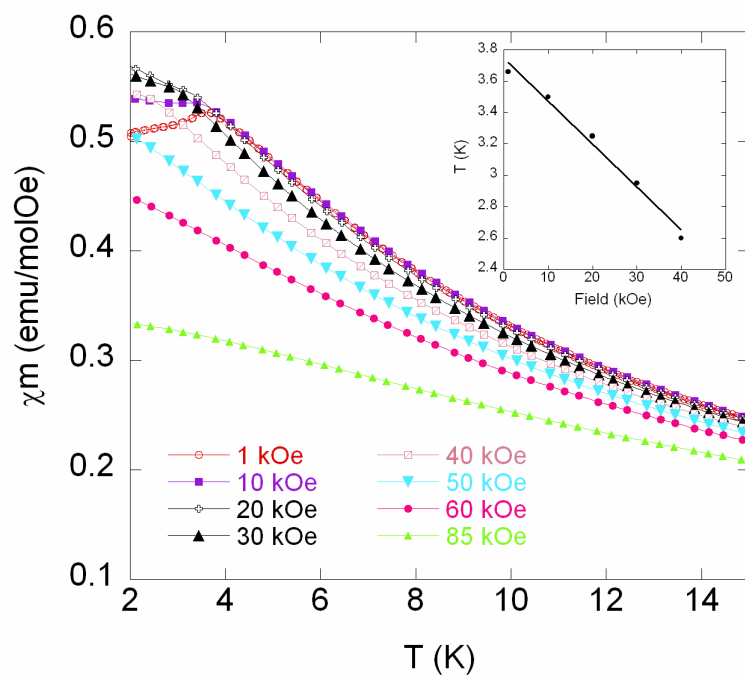

Fig. S.3

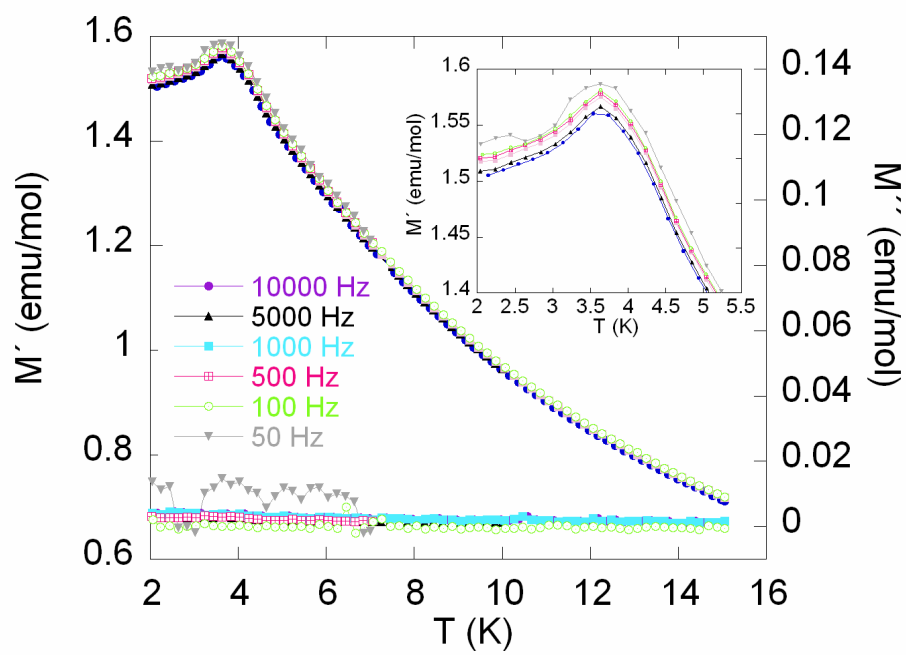

Fig. S.4
